# Supplementary material for: Bioenergetics of Euphausia superba and Euphausia crystallorophias in the Ross Sea
Source: MDPI journal article supplement (doi:10.3390/d15040480), 2023-03-24
Supplement: s1 [file s1]

# Bioenergetics of *Euphausia superba* and *Euphausia crystallorophias* in the Ross Sea

Andrea De Felice \*, Elena Manini, Ilaria Biagiotti and Iole Leonori

National Research Council (CNR), IRBIM—Institute for Marine Biological Resources and Biotechnologies, Largo Fiera della Pesca, 1, 60125 Ancona, Italy  
\* Correspondence: andrea.defelice@cnr.it

Table S1. (a) Biochemical composition of individuals of the two species collected at haul n. 10 analysed by one-way ANOVA and Newman-Keuls test; (b) differences among hauls and among 2 mm TL size classes in *E. superba* and *E. crystallorophias* analysed by non-parametric Kruskal-Wallis one-way ANOVA. ns=not significant, TL=total length.

(a)

| Category     | Species |
|--------------|---------|
| Total length | p<0.001 |
| Protein      | ns      |
| Lipid        | p<0.001 |
| Carbohydrate | p<0.01  |

(b)

| Category     | Hauls             |                            | TL size class     |                            |
|--------------|-------------------|----------------------------|-------------------|----------------------------|
|              | <i>E. superba</i> | <i>E. crystallorophias</i> | <i>E. superba</i> | <i>E. crystallorophias</i> |
| Protein      | ns                | p<0.01                     | ns                | ns                         |
| Lipid        | p<0.001           | p<0.001                    | ns                | ns                         |
| Carbohydrate | p<0.001           | p<0.001                    | ns                | p<0.001                    |

Table S2. Biochemical composition of the two krill species analysed by Mann-Whitney's test.

| Category     | Species |
|--------------|---------|
| Protein      | p<0.001 |
| Lipid        | p<0.001 |
| Carbohydrate | p<0.001 |

Table S3. Similarity percentages among samples from the same haul and dissimilarity percentage among hauls according to different parameters.

| Parameter compared | Most diverse categories | Dissimilarity interval | Average dissimilarity | Similarity interval within a station |
|--------------------|-------------------------|------------------------|-----------------------|--------------------------------------|
| Species            | 1 <sup>st</sup> protein | 24.68 – 49.83          | 34.22                 | 73.49 – 87.76                        |
|                    | 2 <sup>nd</sup> lipid   |                        |                       |                                      |
| Latitude           | 1 <sup>st</sup> protein | 22 - 25                | 23.5                  |                                      |
|                    | 2 <sup>nd</sup> lipid   |                        |                       |                                      |
| Inshore-offshore   | 1 <sup>st</sup> protein | 16.18 – 30.82          | 21.8                  |                                      |
|                    | 2 <sup>nd</sup> lipid   |                        |                       |                                      |

Tab. S4. Hauls displaying significant differences ( $p < 0.1\%$ ). 10s = *E. superba* from haul n. 10, 10c = *E. crystallorophias* from haul n. 10.

| Stations | Statistical R | Significance level % |
|----------|---------------|----------------------|
| 30-7     | 0.280         | 0.1                  |
| 30-8     | 0.293         | 0.1                  |
| 30-13    | 0.554         | 0.1                  |
| 30-17    | 0.293         | 0.1                  |
| 30-10c   | 0.676         | 0.1                  |
| 10s-13   | 0.318         | 0.1                  |
| 10s-10c  | 0.378         | 0.1                  |
| 1-7      | 0.243         | 0.1                  |
| 1-8      | 0.280         | 0.1                  |
| 1-13     | 0.534         | 0.1                  |
| 1-17     | 0.282         | 0.1                  |
| 1-10c    | 0.636         | 0.1                  |
| 26-7     | 0.279         | 0.1                  |
| 26-8     | 0.274         | 0.1                  |
| 26-13    | 0.523         | 0.1                  |
| 26-17    | 0.247         | 0.1                  |
| 26-10c   | 0.643         | 0.1                  |
| 27-7     | 0.427         | 0.1                  |
| 27-8     | 0.403         | 0.1                  |
| 27-13    | 0.718         | 0.1                  |
| 27-17    | 0.465         | 0.1                  |
| 27-10c   | 0.749         | 0.1                  |
| 28-7     | 0.435         | 0.1                  |
| 28-8     | 0.382         | 0.1                  |
| 28-13    | 0.731         | 0.1                  |
| 28-17    | 0.492         | 0.1                  |
| 28-10c   | 0.715         | 0.1                  |
| 7-10c    | 0.331         | 0.1                  |
| 17-10c   | 0.262         | 0.1                  |
